# Supplementary material
Source: Springer Nature journal article supplement (https://www.springermedizin.de/resource/supplementary/13049_2011_286_MOESM2_ESM.pdf/9666266)
Supplement: MOESM2 [file 9666266]

**Table 1 - Mean time used to insert supraglottic devices and endotracheal tube in simulated optimal and restricted access**

| Device       | Manikin   | Scenario       | Number | Successful | Mean time (seconds) | SD   |
|--------------|-----------|----------------|--------|------------|---------------------|------|
| iGel™        | Ambu™     | A (optimal)    | 20     | All        | 9.9                 | 4.5  |
| iGel™        | Ambu™     | B (restricted) | 20     | All        | 12.3                | 3.6  |
| LTSII™       | Ambu™     | A (optimal)    | 20     | All        | 12.8                | 2.9  |
| LTSII™       | Ambu™     | B (restricted) | 20     | All        | 10.6                | 3.2  |
| Macintosh #3 | TrueCorp™ | A (Optimal)    | 20     | Yes        | 12.1                | 3.3  |
|              |           |                | 0      | No         |                     |      |
| Macintosh #3 | TrueCorp™ | B (Restricted) | 16     | Yes        | 28.0                | 13.0 |
|              |           |                | 4      | No         |                     |      |

**P-values for comparing same device in scenario A versus B**

|                                                                              |          |    |
|------------------------------------------------------------------------------|----------|----|
| Mean time with iGel in scenario A vs scenario B                              | p = 0.09 | NS |
| Mean time with LTSII in scenario A vs scenario B                             | p = 0.01 | S  |
| Mean time with Macintosh laryngoscope (blade #3) in scenario A vs Scenario B | p < 0.01 | S  |

**P-value for comparing devices with each other in scenario A**

|                                      |          |    |
|--------------------------------------|----------|----|
| Mean time with iGel vs LTSII         | p = 0.69 | NS |
| Mean time with Macintosh #3 vs iGel  | p = 0.88 | NS |
| Mean time with Macintosh #3 vs LTSII | p = 0.19 | NS |

**P-values for comparing different devices with each other in scenario B**

|                                      |           |    |
|--------------------------------------|-----------|----|
| Mean time with iGel vs LTSII         | p = 0.50  | NS |
| Mean time with Macintosh #3 vs iGel  | p < 0.001 | S  |
| Mean time with Macintosh #3 vs LTSII | p < 0.001 | S  |

\* In three cases the HEMS physician chose to use digital technique when inserting the ET. In four cases of traditional direct laryngoscopy no ET was placed within the timelimit of 60 seconds. In 13 cases classic laryngoscopy technique succeeded within 60 seconds. NS = Non-significant, S = significant
